# Supplementary material for: Efficacy and Safety of Exenatide Once Weekly Versus Metformin, Pioglitazone, and Sitagliptin Used as Monotherapy in Drug-Naive Patients With Type 2 Diabetes (DURATION-4): A 26-week double-blind study
Source: PubMed Central journal article supplement — Diabetes Care. 2012 Jan 16;35(2):252–8. doi: 10.2337/dc11-1107 (PMC3263915; doi:10.2337/dc11-1107), 2012-01-16

**Participating  
Investigators:**

**Argentina:**

Massari, Fabio  
Sposetti, Georgina  
Maffei, Laura  
Starosiliz, David  
Goycoa, Claudia  
Perez Mangui,  
Federico  
Chertkoff,  
Alejandro  
Salzberg, Susana

**Belgium:**

Mathieu, Chantal  
Timmermans,  
Bruno  
Quintens, Theo  
Reynders, Paul

**Brazil:**

Canani, Luis  
Henrique  
Forti, Adriana  
Chacra, Antonio  
Geloneze, Bruno  
Baggentoss,  
Rejane  
Bandeira,  
Francisco  
Eliashewitz,  
Freddy  
Borges, Joao  
Hissa, Miguel  
Rea, Rosangela

**Canada:**

Duffy, Patrick

Rosenthal, Wendy  
Shu, Daniel  
Garon, Jean  
Kooy, Jacobus  
Janzen, Jeannette  
Gavin, Claire

**France:**

Boye, Alain  
Boucher, Loic  
Guinet, Jean  
Michel  
Lejay, Dominique

**Germany:**

Hanefeld, Markolf  
Rose, Ludger  
Forst, Thomas  
Naudts, Ingomar

**Hungary:**

Fulop, Gabor  
Kis-gombos,  
Piroska  
Dudas, Mihaly

**India:**

Kumar, Harish  
Tandon, Nikhil  
Balaji, Vijayan  
Yajnik,  
Chittaranjan  
Vishwanathan,  
Vijay  
Shivane,  
Vyankatesh  
Prasanna Kumar,  
Kankatte  
Chatterjee, Sudip

Ardhanareeshwarn  
, Sharada  
Shah, Parag  
Kumar, Ajay

**Israel:**

Wainstein, Julio  
Karasik, Avraham  
Minuchin, Oscar

**Italy:**

Dotta, Francesco  
Bonomo, Matteo

**Korea:**

Yoon, Kun-ho  
Park, Sung Woo  
Lee, In Kyu  
Baik, Sei Hyun  
Choi, Dong Seop  
Kim, In Joo  
Koo, Bo Kyung  
Moon, Min Kyong  
Kang, Eun Seok  
Lee, Hyun Chul  
Park, Tae Sun  
Park, Seok-won

**Mexico:**

Nevarez, Luis  
Mauricio, Gilberto  
Gonzalez, Gerardo

**Poland:**

Nowakowski,  
Andrzej  
Jarosz-skokowska,  
Ewa  
Stasinska, Teresa  
Gromniak, Elwira

**Romania:**

Popa, Amarin  
Cimos, Daniela  
Mistodie, Cristina

**Russia:**

Vorobiev, Sergey  
Arefieva, Elena  
Pronin,  
Vyatcheslav  
Miroshnichenko,  
Olga  
Ivanova, Svetlana  
Dvoryashina, Irina  
Zavoronkova,  
Natalia  
Slavitskaya, Elena  
Alpenidze, Diana

**Slovakia:**

Ilavska, Adriana  
Duda, Jozef

**South Africa:**

Coetzer, Thomas  
Wing, Jeffrey  
Bhana, Sindeep  
Jacovides, Andrew

**Spain:**

Duran Garcia,  
Santiago  
Vazquez Martinez,  
Clotilde  
Gonzalbez  
Morgaez, Jose  
De Teresa, Luis

**Taiwan:**

Ma, Wen-ya  
Huang, Chien-ning  
Wang, Tzu-yuan  
Hsieh, An-tsz

**Turkey:**

Altuntas, Yuksel

**United Kingdom:**

Stephens, Jeffrey  
Russell-Jones,  
David  
Atkin, Stephen  
Barnett, Anthony  
Cahill, Thomas  
Frier, Brian

**United States:**

Adelizzi, Angela  
Miller, Jeffrey  
Blevins, Thomas  
Greco, Susan  
Brown, Morris  
Butuk, David  
Comulada Rivera,  
Angel  
Cuddihy, Robert  
Guice, Michael  
Harris, Ronald  
Herring, Charles  
Jacks, Randal  
Kennedy, John  
Severa, Larry  
Ortiz-Carrasquillo,  
Ramon  
Pin, Michael  
Rovner, Sergio  
Samson, Mercedes  
Bhargava, Anuj

SUPPLEMENTARY DATA

**Supplementary Table 1.** Demographics and baseline characteristics

|                              | <b>EQW (N=248)</b> | <b>MET (N=246)</b> | <b>PIO (N=163)</b> | <b>SITA (N=163)</b> |
|------------------------------|--------------------|--------------------|--------------------|---------------------|
| <b>Age, y</b>                | 54 (11)            | 54 (11)            | 55 (11)            | 52 (11)             |
| <b>Gender, n %</b>           |                    |                    |                    |                     |
| <b>Male</b>                  | 139 (56.0)         | 154 (62.6)         | 97 (59.5)          | 94 (57.7)           |
| <b>Female</b>                | 109 (44.0)         | 92 (37.4)          | 66 (40.5)          | 69 (42.3)           |
| <b>Race/Ethnicity, n %</b>   |                    |                    |                    |                     |
| <b>Caucasian</b>             | 169 (68.1)         | 160 (65.0)         | 110 (67.5)         | 113 (69.3)          |
| <b>East Asian</b>            | 34 (13.7)          | 31 (12.6)          | 19 (11.7)          | 18 (11.0)           |
| <b>West Asian</b>            | 21 (8.5)           | 20 (8.1)           | 15 (9.2)           | 15 (9.2)            |
| <b>Hispanic</b>              | 16 (6.5)           | 21 (8.5)           | 15 (9.2)           | 13 (8.0)            |
| <b>African</b>               | 7 (2.8)            | 11 (4.5)           | 4 (2.5)            | 3 (1.8)             |
| <b>Other<sup>a</sup></b>     | 1 (0.4)            | 3 (1.2)            | 0 (0)              | 1 (0.6)             |
| <b>Weight, kg</b>            | 87.5 (18.9)        | 85.9 (19.6)        | 86.1 (17.8)        | 88.7 (18.7)         |
| <b>BMI, kg/m<sup>2</sup></b> | 31.4 (5.3)         | 30.7 (5.5)         | 31.1 (5.3)         | 31.8 (5.4)          |
| <b>HbA<sub>1c</sub>, %</b>   | 8.5 (1.2)          | 8.6 (1.2)          | 8.5 (1.2)          | 8.5 (1.3)           |
| <b>FSG, mmol/L</b>           | 9.9 (2.9)          | 10.0 (3.4)         | 9.8 (3.0)          | 9.7 (2.6)           |
| <b>Duration of T2D, y</b>    | 2.7 (3.2)          | 2.6 (3.6)          | 2.7 (3.7)          | 2.7 (3.7)           |

Data are presented as n (%) or mean (SD). <sup>a</sup>Native American, Aboriginal and/or Torres Strait Islander. ITT population. Abbreviations: HbA<sub>1c</sub> = hemoglobin HbA<sub>1c</sub>; BMI = body mass index; EQW = exenatide once weekly; FSG = fasting serum glucose; MET = metformin; PIO = pioglitazone; SITA = sitagliptin; T2D = type 2 diabetes.

SUPPLEMENTARY DATA

**Supplementary Table 2.** Resolution of ongoing treatment-emergent adverse events during the 10-week safety follow-up

|                              | EQW (N=248)          |                       | MET (N=246)          |                       | PIO (N=163)          |                       | SITA (N=163)         |                       |
|------------------------------|----------------------|-----------------------|----------------------|-----------------------|----------------------|-----------------------|----------------------|-----------------------|
|                              | Ongoing <sup>a</sup> | Resolved <sup>b</sup> |
| <b>Headache</b>              | 2 (0.8)              | 1 (0.4)               | 1 (0.4)              | 0 (0)                 | 0 (0)                | 0 (0)                 | 1 (0.6)              | 1 (0.6)               |
| <b>Diarrhoea</b>             | 2 (0.8)              | 1 (0.4)               | 10 (4.1)             | 1 (0.4)               | 0 (0)                | 0 (0)                 | 1 (0.6)              | 0 (0)                 |
| <b>Injection Site Nodule</b> | 18 (7.3)             | 8 (3.2)               | 17 (6.9)             | 8 (3.3)               | 3 (1.8)              | 1 (0.6)               | 9 (5.5)              | 2 (1.2)               |
| <b>Nasopharyngitis</b>       | 1 (0.4)              | 1 (0.4)               | 2 (0.8)              | 0 (0)                 | 0 (0)                | 0 (0)                 | 1 (0.6)              | 0 (0)                 |
| <b>Nausea</b>                | 1 (0.4)              | 0 (0)                 | 3 (1.2)              | 1 (0.4)               | 0 (0)                | 0 (0)                 | 0 (0)                | 0 (0)                 |
| <b>Dyspepsia</b>             | 5 (2.0)              | 0 (0)                 | 2 (0.8)              | 1 (0.4)               | 1 (0.6)              | 0 (0)                 | 1 (0.6)              | 0 (0)                 |
| <b>Constipation</b>          | 1 (0.4)              | 0 (0)                 | 1 (0.4)              | 0 (0)                 | 0 (0)                | 0 (0)                 | 2 (1.2)              | 0 (0)                 |
| <b>Back Pain</b>             | 0 (0)                | 0 (0)                 | 5 (2.0)              | 1 (0.4)               | 2 (1.2)              | 0 (0)                 | 1 (0.6)              | 0 (0)                 |
| <b>Arthralgia</b>            | 7 (2.8)              | 0 (0)                 | 3 (1.2)              | 0 (0)                 | 5 (3.1)              | 1 (0.6)               | 2 (1.2)              | 1 (0.6)               |
| <b>Hypertension</b>          | 2 (0.8)              | 0 (0)                 | 3 (1.2)              | 0 (0)                 | 8 (4.9)              | 0 (0)                 | 3 (1.8)              | 0 (0)                 |
| <b>Peripheral oedema</b>     | 0 (0)                | 0 (0)                 | 1 (0.4)              | 0 (0)                 | 2 (1.2)              | 0 (0)                 | 0 (0)                | 0 (0)                 |

Data are presented as n (%) of patients. <sup>a</sup>At 26 weeks; <sup>b</sup>By the end of the 10-week safety follow-up. ITT population. Abbreviations: EQW = exenatide once weekly; MET = metformin; PIO = pioglitazone; SITA = sitagliptin.

SUPPLEMENTARY DATA

**Supplementary Table 3.** Change in HbA<sub>1c</sub> (%) from baseline by anti-exenatide antibody status at endpoint

|                                             | <b>Endpoint HbA<sub>1c</sub><br/>(LOCF)</b> | <b>Change from<br/>Baseline to Endpoint<br/>(LOCF)</b> | <b>Between-group<br/>treatment comparison</b> |
|---------------------------------------------|---------------------------------------------|--------------------------------------------------------|-----------------------------------------------|
|                                             | LS mean (SE)                                | LS mean (SE)                                           | LS mean difference (p-<br>value)              |
| Antibody to exenatide<br>at endpoint (LOCF) |                                             |                                                        |                                               |
|                                             |                                             |                                                        |                                               |
| <b>2-level status</b>                       |                                             |                                                        |                                               |
| Negative (n=96)                             | 7.12 (0.12)                                 | -1.31 (0.12)                                           | N/A                                           |
| Positive (n=135)                            | 7.03 (0.10)                                 | -1.39 (0.10)                                           | 0.08 (p=0.549)                                |
|                                             |                                             |                                                        |                                               |
| <b>3-level status</b>                       |                                             |                                                        |                                               |
| Negative (n=96)                             | 7.10 (0.12)                                 | -1.33 (0.12)                                           | N/A                                           |
| Positive lower (n=107)                      | 6.92 (0.12)                                 | -1.51 (0.12)                                           | 0.18 (p=0.214)                                |
| Positive higher (n=28)                      | 7.40 (0.20)                                 | -1.02 (0.20)                                           | -0.31 (p=0.179)                               |

Abbreviations: LOCF = last post-baseline measurement carried forward; LS mean = least-squares mean; n = number of patients having both baseline and post-baseline data; n = total number of patients; N/A = not applicable; SE = standard error.

Note: Only patients with non-missing baseline value and at least one non-missing post-baseline value of the response variable were included in analysis. Antibodies to exenatide were defined as a positive titer reported after a negative titer at baseline, or a positive titer that had increased by at least three dilutions from a detectable baseline titer.

Analysis of covariance (ANCOVA) model: Post-baseline Response Variable = Antibody to Exenatide at Endpoint + Baseline Response Variable + Pooled Country (Type III sums of squares).

SUPPLEMENTARY DATA

**Supplementary Table 4.** IWQOL-Lite Total Scores

|                  | <b>Endpoint (LOCF)</b> | <b>Change from Baseline to Endpoint (LOCF)</b> | <b>Treatment Comparison EQW vs. Comparators</b> | <b>Between-group Comparison p-value</b> |
|------------------|------------------------|------------------------------------------------|-------------------------------------------------|-----------------------------------------|
|                  | LS mean (SE)           | LS mean (SE)                                   | LS mean difference (95% CI)                     |                                         |
| <b>Treatment</b> |                        |                                                |                                                 |                                         |
| EQW (n=228)      | 88.38 (0.77)           | 4.85 (0.77)                                    | N/A                                             | N/A                                     |
| MET (n=221)      | 88.37 (0.77)           | 4.84 (0.77)                                    | 0.01 (-2.02, 2.04)                              | 0.994                                   |
| PIO (n=142)      | 84.84 (0.94)           | 1.31 (0.94)                                    | 3.54 (1.23, 5.84)                               | 0.003                                   |
| SITA (n=142)     | 87.55 (0.95)           | 4.02 (0.95)                                    | 0.83 (-1.48, 3.13)                              | 0.482                                   |

Abbreviations: CI = confidence interval; EQW = exenatide once weekly; IWQOL-Lite = Impact of Weight on Quality of Life Questionnaire-Lite; LOCF = last post-baseline measurement carried forward; LS Mean = least-squares mean; MET = metformin; n = number of patients having both baseline and post-baseline data; N/A = not applicable; PIO = pioglitazone; SE = standard error; SITA = sitagliptin; vs. = versus.

Note: Only patients with non-missing baseline value and at least one non-missing post-baseline value of the response variable were included.

Analysis of covariance (ANCOVA) model: Post-baseline Variable = Treatment + Baseline Response Variable + Pooled Country (Type III sums of squares). The two-sided 95% confidence interval is for the LS mean difference between Exenatide, MET, PIO and SITA.

SUPPLEMENTARY DATA

**Supplementary Table 5. BES Total Score**

|                  | <b>Endpoint (LOCF)</b> | <b>Change from Baseline to Endpoint (LOCF)</b> | <b>Treatment Comparison EQW vs. Comparators</b> | <b>Between-group Comparison p-value</b> |
|------------------|------------------------|------------------------------------------------|-------------------------------------------------|-----------------------------------------|
|                  | LS mean (SE)           | LS mean (SE)                                   | LS mean difference (95% CI)                     |                                         |
| <b>Treatment</b> |                        |                                                |                                                 |                                         |
| EQW (n=212)      | 5.02 (0.34)            | -2.66 (0.34)                                   | N/A                                             | N/A                                     |
| MET (n=196)      | 5.04 (0.35)            | -2.64 (0.35)                                   | -0.02 (-0.94, 0.89)                             | 0.961                                   |
| PIO (n=163)      | 6.61 (0.41)            | -1.07 (0.41)                                   | -1.59 (-2.61, -0.57)                            | 0.002                                   |
| SITA (n=163)     | 5.99 (0.41)            | -1.69 (0.41)                                   | -0.97 (-1.98, 0.03)                             | 0.058                                   |

Abbreviations: BES = Binge Eating Scale; CI = confidence interval; EQW = exenatide once weekly; LOCF = last post-baseline measurement carried forward; LS mean = least-squares mean; MET = metformin; n = number of patients having both baseline and post-baseline data; N/A = not applicable; PIO = pioglitazone; SE = standard error; SITA = sitagliptin; vs. = versus.

Note: Only patients with non-missing baseline value and at least one non-missing post-baseline value of the response variable were included.

Analysis of covariance (ANCOVA) model: Post-baseline Response Variable = Treatment + Baseline Response Variable + Pooled Country (Type III sums of squares). The two-sided 95% confidence interval is for the LS mean difference between Exenatide, MET, PIO and SITA.

SUPPLEMENTARY DATA

**Supplementary Table 6.** DTSQc Total Scores

|                  | <b>Endpoint (LOCF)</b> | <b>Treatment Comparison EQW vs. Comparators</b> | <b>Between-group Comparison p-value</b> |
|------------------|------------------------|-------------------------------------------------|-----------------------------------------|
|                  | LS mean (SE)           | LS mean difference (95% CI)                     |                                         |
| <b>Treatment</b> |                        |                                                 |                                         |
| EQW (n=221)      | 13.08                  | N/A                                             | N/A                                     |
| MET (n=224)      | 12.42                  | 0.65 (-0.48, 1.78)                              | 0.257                                   |
| PIO (n=143)      | 13.35                  | -0.27 (-1.55, 1.01)                             | 0.676                                   |
| SITA (n=140)     | 12.49                  | 0.59 (-0.70, 1.87)                              | 0.371                                   |

Abbreviations: CI = confidence interval; DTSQc = Diabetes Treatment Satisfaction Questionnaire (change version); EQW = exenatide once weekly; LOCF = last post-baseline measurement carried forward; LS mean = least-squares mean; MET = metformin; n = number of patients having both baseline and post-baseline data; N/A = not applicable; PIO = pioglitazone; SE = standard error; SITA = sitagliptin; vs. = versus.

Analysis of covariance (ANCOVA) model: Post-baseline Response Variable = Treatment + Pooled Country (Type III sums of squares). The two-sided 95% confidence interval is for the LS mean difference between Exenatide, MET, PIO and SITA.

SUPPLEMENTARY DATA

**Supplementary Table 7. DTSQs Total Scores**

|                  | <b>Endpoint (LOCF)</b> | <b>Change from Baseline to Endpoint (LOCF)</b> | <b>Treatment Comparison EQW vs. Comparators</b> | <b>Between-group Comparison p-value</b> |
|------------------|------------------------|------------------------------------------------|-------------------------------------------------|-----------------------------------------|
|                  | LS mean (SE)           | LS mean (SE)                                   | LS mean difference (95% CI)                     |                                         |
| <b>Treatment</b> |                        |                                                |                                                 |                                         |
| EQW (n=222)      | 30.78 (0.40)           | 3.38 (0.40)                                    | N/A                                             | N/A                                     |
| MET (n=210)      | 30.34 (0.40)           | 2.95 (0.40)                                    | 0.43 (-0.62, 1.49)                              | 0.421                                   |
| PIO (n=138)      | 31.10 (0.49)           | 3.70 (0.49)                                    | -0.32 (-1.51, 0.88)                             | 0.600                                   |
| SITA (n=143)     | 30.01 (0.48)           | 2.61 (0.48)                                    | 0.77 (-0.41, 1.95)                              | 0.200                                   |

Abbreviations: CI = confidence interval; DTSQs = Diabetes Treatment Satisfaction Questionnaire (status version); EQW = exenatide once weekly; LOCF = last post-baseline measurement carried forward; LS mean = least-squares mean; MET = metformin; n = number of patients having both baseline and post-baseline data; N/A = not applicable; PIO = pioglitazone; SE = standard error; SITA = sitagliptin; vs. = versus. Note: Only patients with non-missing baseline value and at least one non-missing post-baseline value of the response variable were included.

Analysis of covariance (ANCOVA) model: Post-baseline Response Variable = Treatment + Baseline Response Variable + Pooled Country (Type III sums of squares). The two-sided 95% confidence interval is for the LS mean difference between Exenatide, MET, PIO and SITA.



SUPPLEMENTARY DATA

**Supplementary Table 8. EQ-5D Index Scores**

**UK Population-based Index Score**

|                  | <b>Endpoint (LOCF)</b> | <b>Change from Baseline to Endpoint (LOCF)</b> | <b>Treatment Comparison EQW vs. Comparators</b> | <b>Between-group Comparison p-value</b> |
|------------------|------------------------|------------------------------------------------|-------------------------------------------------|-----------------------------------------|
|                  | LS mean (SE)           | LS mean (SE)                                   | LS mean difference (95% CI)                     |                                         |
| <b>Treatment</b> |                        |                                                |                                                 |                                         |
| EQW (n=232)      | 0.88 (0.01)            | 0.03 (0.01)                                    | N/A                                             | N/A                                     |
| MET (n=227)      | 0.88 (0.01)            | 0.03 (0.01)                                    | 0.00 (-0.02, 0.03)                              | 0.854                                   |
| PIO (n=146)      | 0.84 (0.01)            | -0.01 (0.01)                                   | 0.04 (0.01, 0.07)                               | 0.012                                   |
| SITA (n=149)     | 0.87 (0.01)            | 0.02 (0.01)                                    | 0.02 (-0.02, 0.05)                              | 0.327                                   |

Abbreviations: CI = confidence interval; EQ-5D = EuroQol-5 dimensions; EQW = exenatide once weekly; LOCF = last post-baseline measurement carried forward; LS mean = least-squares mean; MET = metformin; n = number of patients having both baseline and post-baseline data; N/A = not applicable; PIO = pioglitazone; SE = standard error; SITA = sitagliptin; vs. = versus. Note: Only patients with non-missing baseline value and at least one non-missing post-baseline value of the response variable were included.

Analysis of covariance (ANCOVA) model: Post-baseline Response Variable = Treatment + Baseline Response Variable + Pooled Country (Type III sums of squares). The two-sided 95% confidence interval is for the LS mean difference between Exenatide, MET, PIO and SITA.

SUPPLEMENTARY DATA

**Supplementary Table 9.** EQ-5D Index Scores

**US Population-based Index Score**

|                  | <b>Endpoint (LOCF)</b> | <b>Change from Baseline to Endpoint (LOCF)</b> | <b>Treatment Comparison EQW vs. Comparators</b> | <b>Between-group Comparison p-value</b> |
|------------------|------------------------|------------------------------------------------|-------------------------------------------------|-----------------------------------------|
|                  | LS mean (SE)           | LS mean (SE)                                   | LS mean difference (95% CI)                     |                                         |
| <b>Treatment</b> |                        |                                                |                                                 |                                         |
| EQW (n=232)      | 0.90 (0.01)            | 0.02 (0.01)                                    | N/A                                             | N/A                                     |
| MET (n=227)      | 0.91 (0.01)            | 0.02 (0.01)                                    | 0.00 (-0.02, 0.02)                              | 0.840                                   |
| PIO (n=146)      | 0.88 (0.01)            | -0.01 (0.01)                                   | 0.03 (0.00, 0.05)                               | 0.019                                   |
| SITA (n=149)     | 0.89 (0.01)            | 0.01 (0.01)                                    | 0.01 (-0.01, 0.03)                              | 0.445                                   |

Abbreviations: CI = confidence interval; EQ-5D = EuroQol-5 dimensions; EQW = exenatide once weekly; LOCF = last post-baseline measurement carried forward; LS mean = least-squares mean; MET = metformin; n = number of patients having both baseline and post-baseline data; N/A = not applicable; PIO = pioglitazone; SE = standard error; SITA = sitagliptin; vs. = versus. Note: Only patients with non-missing baseline value and at least one non-missing post-baseline value of the response variable were included.

Analysis of covariance (ANCOVA) model: Post-baseline Response Variable = Treatment + Baseline Response Variable + Pooled Country (Type III sums of squares). The two-sided 95% confidence interval is for the LS mean difference between Exenatide, MET, PIO and SITA.

SUPPLEMENTARY DATA

**Supplementary Figure 1A.** Mean (SE) 7-point SMBG at baseline (solid lines) and endpoint (LOCF) (dashed lines) with EQW (white circles) and MET (light gray squares). Postprandial was 2 hours after the start of the meal. Abbreviations: EQW = exenatide once weekly; LOCF = last observation carried forward; MET = metformin; SE = standard error; SMBG = self-monitored blood glucose.

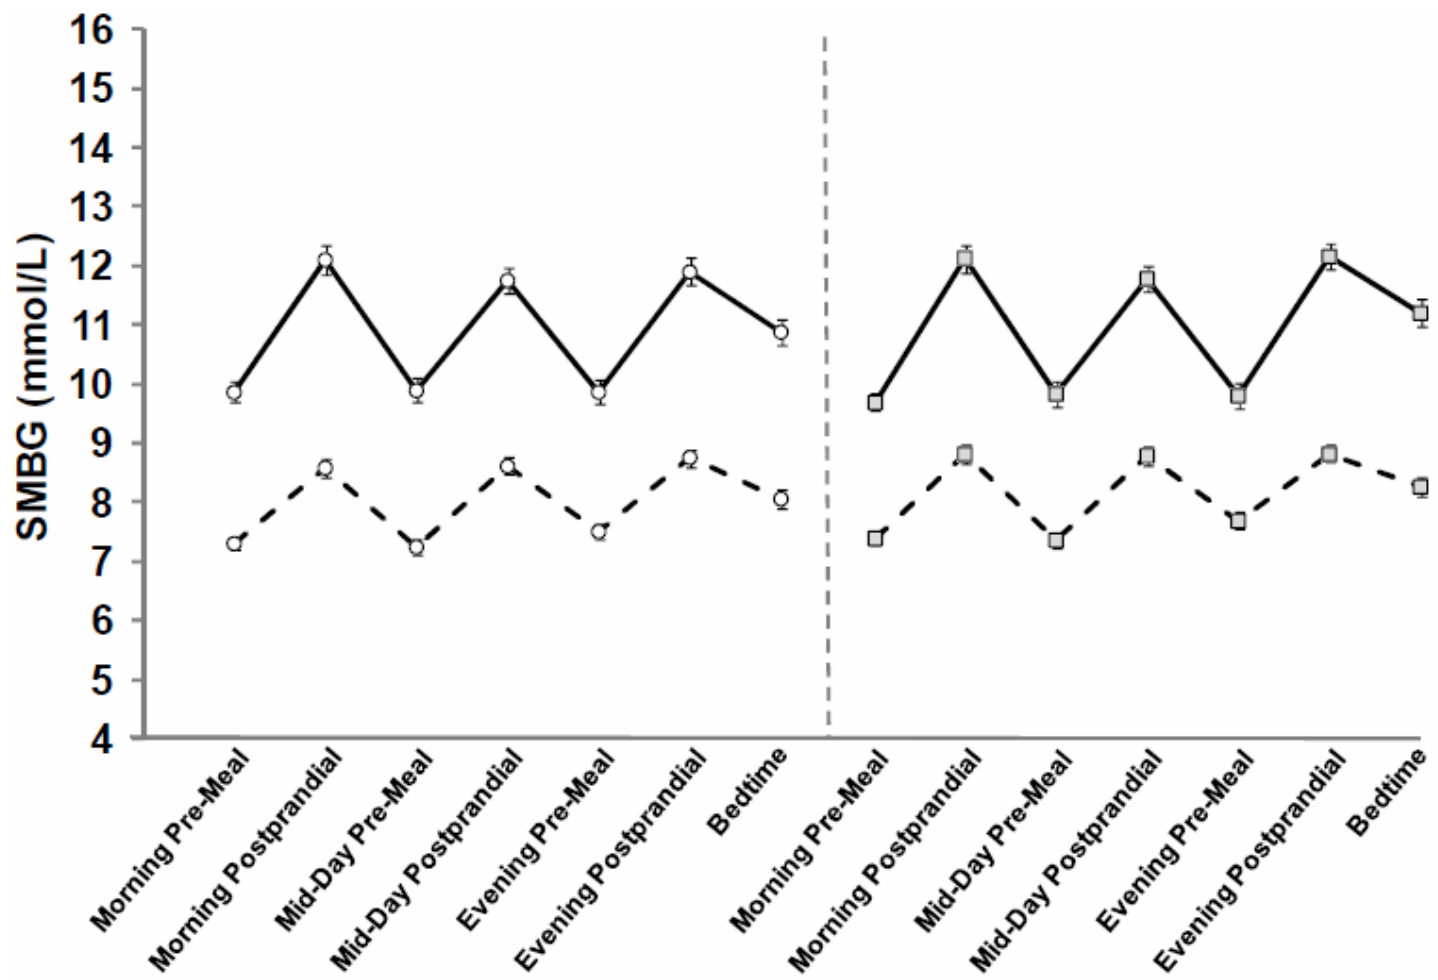

SUPPLEMENTARY DATA

**Supplementary Figure 1B.** Mean (SE) 7-point SMBG at baseline (solid lines) and endpoint (LOCF) (dashed lines) with EQW (white circles) and PIO (dark gray triangles). Postprandial was 2 hours after the start of the meal. Abbreviations: EQW = exenatide once weekly; LOCF = last observation carried forward; PIO = pioglitazone; SE = standard error; SMBG = self-monitored blood glucose.

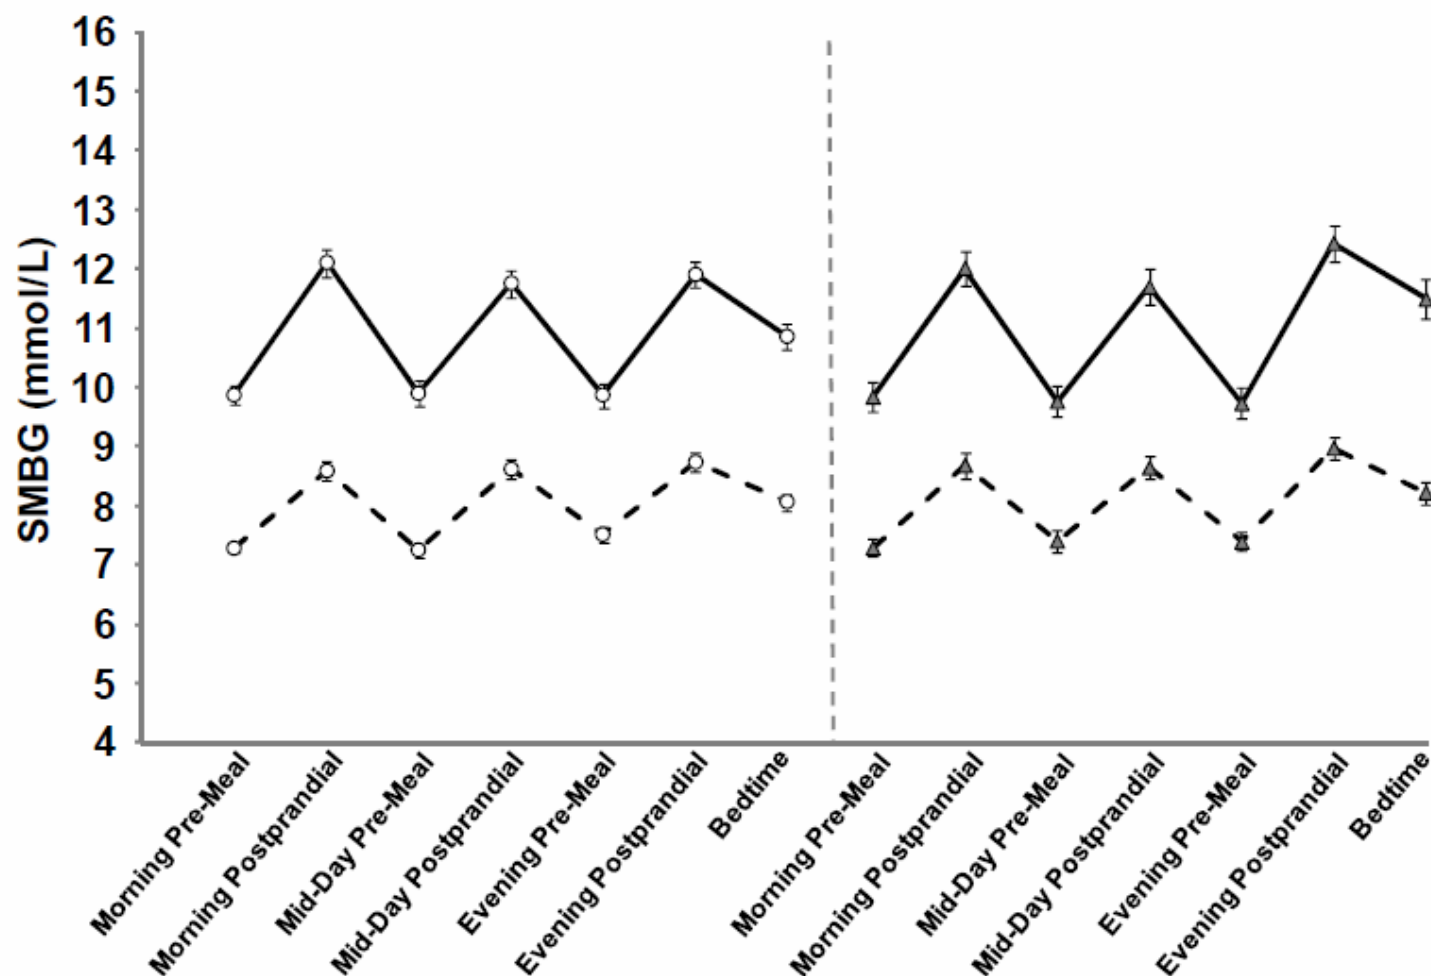

SUPPLEMENTARY DATA

**Supplementary Figure 1C.** Mean (SE) 7-point SMBG at baseline (solid lines) and endpoint (LOCF) (dashed lines) with EQW (white circles) and SITA (black diamonds). Postprandial was 2 hours after the start of the meal. Abbreviations: EQW = exenatide once weekly; LOCF = last observation carried forward; SE = standard error; SITA = sitagliptin; SMBG = self-monitored blood glucose.

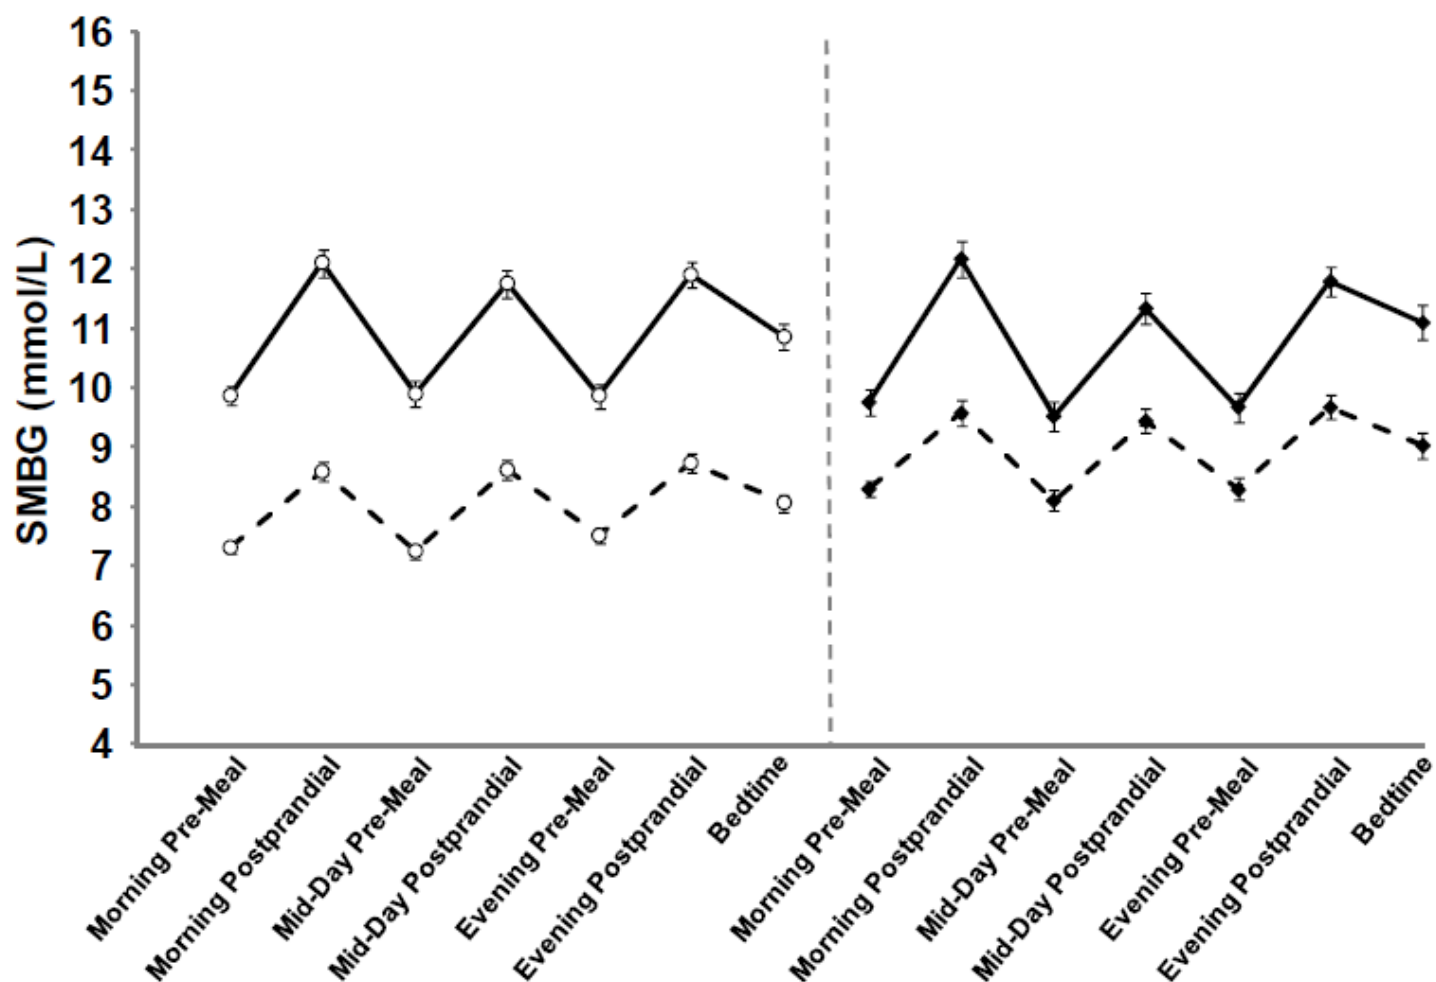

SUPPLEMENTARY DATA

**Supplementary Figures 2A-D.** Changes in HbA<sub>1c</sub> vs. changes in weight over 26 weeks. White circles = EQW; light gray squares = MET; dark gray triangles = PIO; white diamonds = SITA.

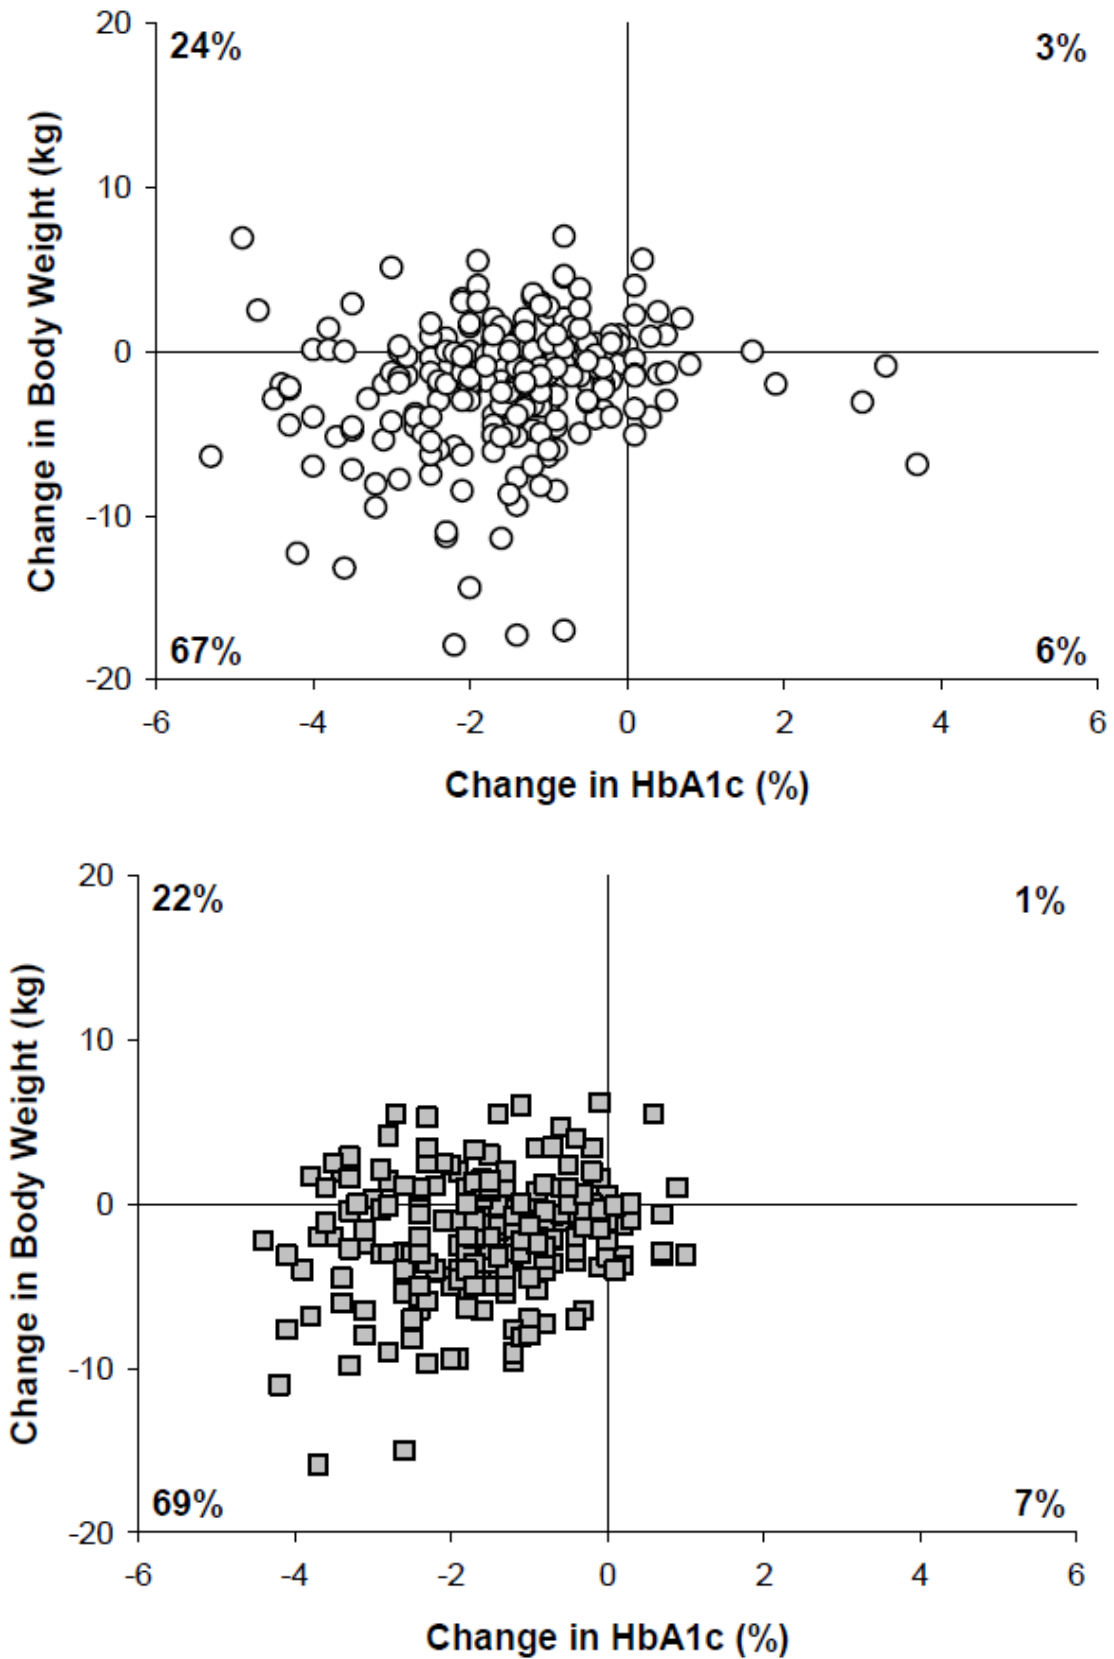

SUPPLEMENTARY DATA

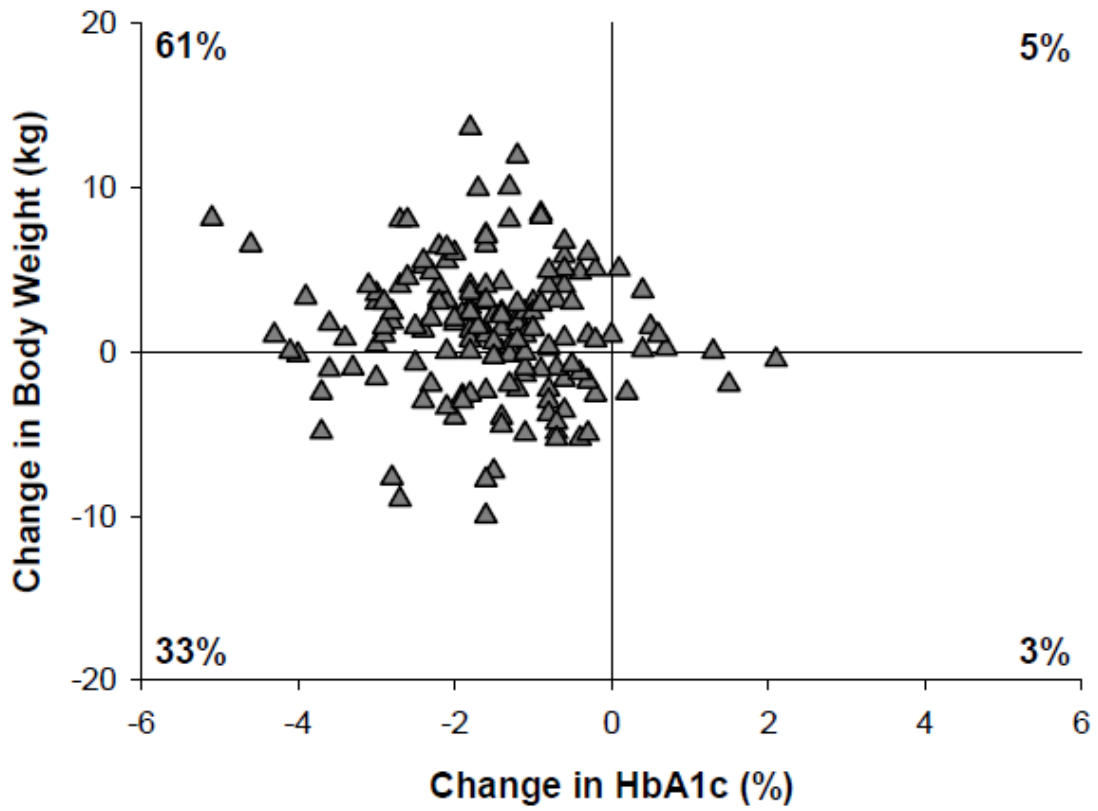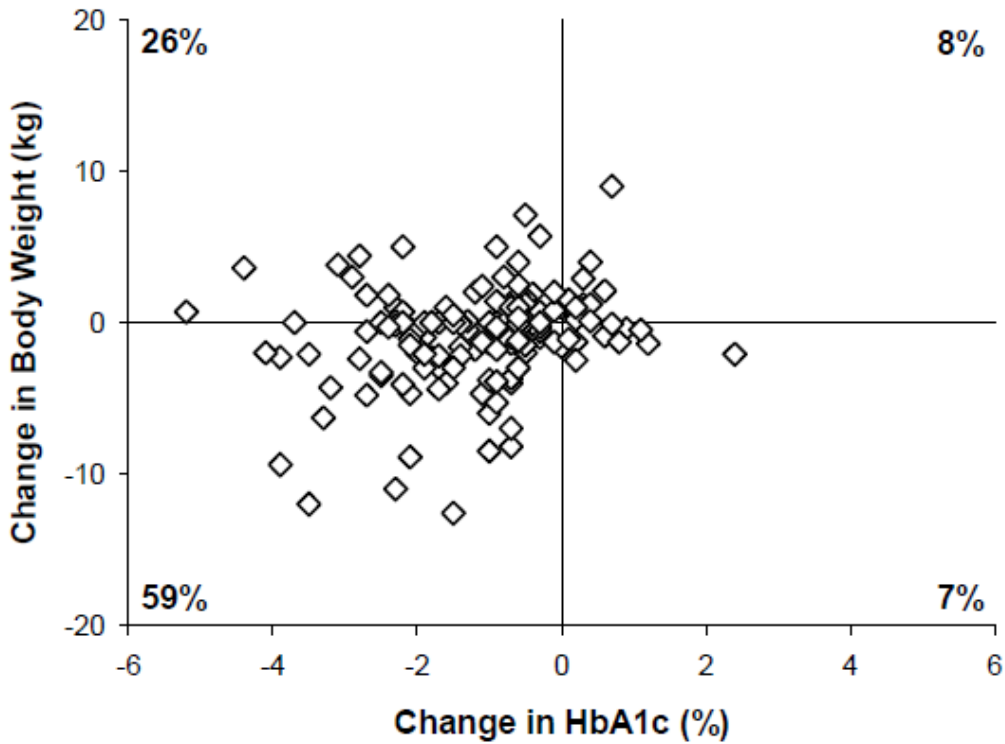

Supplement: supp_dc11-1107v111107_DC111107SupplementaryData.pdf [file supp_dc11-1107v111107_DC111107SupplementaryData.pdf]
